# Supplementary material
Source: MDPI journal article supplement (https://www.mdpi.com/2071-1050/12/22/9749)
Supplement: s1 [file s1]

# Supplementary Material

## Current (2020) and Long-term (2035 and 2050) Sustainable Potentials of Wood Fuel in Switzerland

Matthias Erni <sup>1,\*</sup>, Vanessa Burg <sup>1</sup>, Leo Bont <sup>1</sup>, Oliver Thees <sup>1</sup>, Marco Ferretti <sup>1</sup>, Golo Stadelmann and Janine Schweier <sup>1</sup>

<sup>1</sup> Federal Institute for Forest, Snow and Landscape Research (WSL), Research Group Sustainable Forestry, Zürcherstrasse 111, CH-8903 Birmensdorf

\* Correspondence: matthias.erni@wsl.ch, Tel.: +41-44-739-21-24

Received: 30.09.2020; Accepted: date; Published: date

### Contents

|                                                       |    |
|-------------------------------------------------------|----|
| S1: Wood fuel from forests                            | 2  |
| S2: Wood fuel from trees outside forests (landscapes) | 6  |
| S3: Wood fuel from residues                           | 10 |
| S4: Wood fuel from waste wood                         | 11 |
| S5: All woody biomass                                 | 11 |
| S6: All biomass types                                 | 12 |

### Abbreviations

|         |                                      |
|---------|--------------------------------------|
| AS      | Areal statistics                     |
| CSI     | Continuous stock increase            |
| EO-     | Less energy-oriented wood market     |
| EO+     | Energy-oriented wood market          |
| ESP     | Ecologically sustainable potential   |
| HeProMo | Harvesting productivity models       |
| LSR     | Large stock reduction                |
| MASSIMO | Management scenario simulation model |
| MSR     | Moderate stock reduction             |
| NFI     | National Forest Inventory            |
| SP      | Sustainable potential                |
| TP      | Theoretical potential                |

**S1: Wood fuel from forests****S1 Table 1:** Theoretical potential of wood fuel from forests in Switzerland in the years 2020, 2035 and 2050, in total and for broadleaves and conifers separately.

| Year | Scenario | Wood type   | [PJ a <sup>-1</sup> ]* |          |         | M [m <sup>3</sup> a <sup>-1</sup> ] |          |         |
|------|----------|-------------|------------------------|----------|---------|-------------------------------------|----------|---------|
|      |          |             | Minimum                | Expected | Maximum | Minimum                             | Expected | Maximum |
| 2020 | CSI      | Total       | 86.6                   | 88.9     | 93.5    | 11.86                               | 12.17    | 12.49   |
|      |          | Conifers    | 40.1                   | 41.2     | 42.3    | 6.51                                | 6.68     | 6.86    |
|      |          | Broadleaves | 46.5                   | 47.7     | 51.2    | 5.35                                | 5.49     | 5.63    |
|      | MSR      | Total       | 99.1                   | 102.1    | 107.7   | 13.72                               | 14.15    | 14.57   |
|      |          | Conifers    | 49.3                   | 50.8     | 52.4    | 7.99                                | 8.24     | 8.49    |
|      |          | Broadleaves | 49.8                   | 51.3     | 55.3    | 5.73                                | 5.91     | 6.08    |
|      | LSR      | Total       | 114.1                  | 118.1    | 125.0   | 15.76                               | 16.31    | 16.87   |
|      |          | Conifers    | 55.8                   | 57.8     | 59.7    | 9.05                                | 9.37     | 9.68    |
|      |          | Broadleaves | 58.3                   | 60.3     | 65.3    | 6.71                                | 6.95     | 7.18    |
| 2035 | CSI      | Total       | 91.1                   | 100.4    | 112.3   | 12.52                               | 13.79    | 15.06   |
|      |          | Conifers    | 43.1                   | 47.5     | 51.9    | 6.99                                | 7.70     | 8.41    |
|      |          | Broadleaves | 48.0                   | 52.9     | 60.4    | 5.53                                | 6.09     | 6.65    |
|      | MSR      | Total       | 106.6                  | 110.3    | 116.9   | 14.65                               | 15.17    | 15.68   |
|      |          | Conifers    | 50.7                   | 52.4     | 54.2    | 8.21                                | 8.50     | 8.79    |
|      |          | Broadleaves | 55.9                   | 57.9     | 62.6    | 6.44                                | 6.67     | 6.89    |
|      | LSR      | Total       | 120.6                  | 124.8    | 132.1   | 16.67                               | 17.26    | 17.84   |
|      |          | Conifers    | 59.4                   | 61.5     | 63.5    | 9.63                                | 9.97     | 10.30   |
|      |          | Broadleaves | 61.2                   | 63.3     | 68.5    | 7.05                                | 7.29     | 7.54    |
| 2050 | CSI      | Total       | 91.0                   | 103.0    | 117.9   | 12.50                               | 14.16    | 15.80   |
|      |          | Conifers    | 43.2                   | 48.9     | 54.6    | 7.00                                | 7.93     | 8.90    |
|      |          | Broadleaves | 47.8                   | 54.1     | 63.2    | 5.50                                | 6.23     | 7.00    |
|      | MSR      | Total       | 88.5                   | 93.5     | 100.7   | 12.30                               | 12.96    | 13.70   |
|      |          | Conifers    | 44.4                   | 46.9     | 49.4    | 7.20                                | 7.60     | 8.00    |
|      |          | Broadleaves | 44.1                   | 46.6     | 51.3    | 5.10                                | 5.36     | 5.60    |
|      | LSR      | Total       | 75.3                   | 77.6     | 81.7    | 10.40                               | 10.76    | 11.10   |
|      |          | Conifers    | 37.7                   | 38.8     | 39.9    | 6.10                                | 6.29     | 6.50    |
|      |          | Broadleaves | 37.7                   | 38.8     | 41.8    | 4.30                                | 4.47     | 4.60    |

\*primary energy

**S1 Table 2:** Sustainable potential of wood fuel from forests in Switzerland in the years 2020, 2035 and 2050 in Switzerland, in total and for broadleaves and conifers separately.

| Time | Scenario | Wood type   | [P] a <sup>-1</sup> * |          |         | M [m <sup>3</sup> a <sup>-1</sup> ] |          |         |
|------|----------|-------------|-----------------------|----------|---------|-------------------------------------|----------|---------|
|      |          |             | Minimum               | Expected | Maximum | Minimum                             | Expected | Maximum |
| 2020 | CSI      | Total       | 13.9                  | 20.8     | 24.9    | 1.83                                | 2.72     | 3.28    |
|      |          | Conifers    | 4.7                   | 6.8      | 8.8     | 0.76                                | 1.10     | 1.43    |
|      |          | Broadleaves | 9.2                   | 14.0     | 16.1    | 1.06                                | 1.61     | 1.85    |
|      | MSR      | Total       | 19.9                  | 30.3     | 36.7    | 2.62                                | 3.99     | 4.88    |
|      |          | Conifers    | 7.1                   | 10.7     | 13.9    | 1.16                                | 1.73     | 2.25    |
|      |          | Broadleaves | 12.7                  | 19.6     | 22.8    | 1.46                                | 2.26     | 2.63    |
|      | LSR      | Total       | 25.7                  | 39.5     | 47.3    | 3.38                                | 5.19     | 6.28    |
|      |          | Conifers    | 9.1                   | 13.7     | 17.7    | 1.47                                | 2.23     | 2.86    |
|      |          | Broadleaves | 16.6                  | 25.7     | 29.6    | 1.92                                | 2.96     | 3.41    |
| 2035 | CSI      | Total       | 13.7                  | 21.1     | 31.7    | 1.80                                | 2.75     | 4.18    |
|      |          | Conifers    | 4.6                   | 6.9      | 11.2    | 0.74                                | 1.12     | 1.81    |
|      |          | Broadleaves | 9.2                   | 14.2     | 20.6    | 1.06                                | 1.64     | 2.37    |
|      | MSR      | Total       | 20.4                  | 31.7     | 38.7    | 2.67                                | 4.15     | 5.11    |
|      |          | Conifers    | 6.7                   | 10.5     | 13.9    | 1.11                                | 1.70     | 2.25    |
|      |          | Broadleaves | 13.5                  | 21.3     | 24.8    | 1.56                                | 2.45     | 2.86    |
|      | LSR      | Total       | 23.6                  | 36.2     | 44.7    | 3.13                                | 4.79     | 5.97    |
|      |          | Conifers    | 8.8                   | 13.2     | 17.4    | 1.42                                | 2.14     | 2.82    |
|      |          | Broadleaves | 14.8                  | 23.0     | 27.3    | 1.71                                | 2.65     | 3.15    |
| 2050 | CSI      | Total       | 12.4                  | 18.5     | 27.4    | 1.63                                | 2.41     | 3.62    |
|      |          | Conifers    | 4.2                   | 6.1      | 9.9     | 0.68                                | 0.99     | 1.60    |
|      |          | Broadleaves | 8.2                   | 12.3     | 17.5    | 0.94                                | 1.42     | 2.02    |
|      | MSR      | Total       | 13.0                  | 20.1     | 26.5    | 1.72                                | 2.66     | 3.54    |
|      |          | Conifers    | 4.9                   | 7.2      | 10.5    | 0.79                                | 1.17     | 1.70    |
|      |          | Broadleaves | 8.09                  | 12.9     | 16.0    | 0.93                                | 1.49     | 1.85    |
|      | LSR      | Total       | 9.1                   | 14.5     | 20.0    | 1.34                                | 1.95     | 2.71    |
|      |          | Conifers    | 4.1                   | 5.8      | 8.6     | 0.67                                | 0.93     | 1.40    |
|      |          | Broadleaves | 5.8                   | 8.8      | 11.4    | 0.67                                | 1.01     | 1.31    |

\*primary energy

**S1 Table 3:** Ecologically sustainable potential (ESP, no costs considered) of wood fuel from forests in Switzerland in the years 2020, 2035 and 2050 in total and for broadleaves and conifers separately.

| Time | Scenario | Wood type   | [PJ a <sup>-1</sup> ]* |          |         | M [m <sup>3</sup> a <sup>-1</sup> ] |          |         |
|------|----------|-------------|------------------------|----------|---------|-------------------------------------|----------|---------|
|      |          |             | Minimum                | Expected | Maximum | Minimum                             | Expected | Maximum |
| 2020 | CSI      | Total       | 23.0                   | 33.3     | 33.0    | 3.03                                | 4.39     | 4.38    |
|      |          | Conifers    | 8.2                    | 11.7     | 12.3    | 1.33                                | 1.90     | 1.99    |
|      |          | Broadleaves | 14.8                   | 21.6     | 20.8    | 1.70                                | 2.49     | 2.39    |
|      | MSR      | Total       | 33.7                   | 44.2     | 49.3    | 4.50                                | 5.89     | 6.60    |
|      |          | Conifers    | 13.0                   | 17.0     | 19.7    | 2.11                                | 2.75     | 3.20    |
|      |          | Broadleaves | 20.7                   | 27.2     | 29.5    | 2.38                                | 3.14     | 3.40    |
|      | LSR      | Total       | 41.6                   | 55.6     | 61.6    | 5.55                                | 7.41     | 8.25    |
|      |          | Conifers    | 16.0                   | 21.2     | 24.4    | 2.59                                | 3.44     | 3.96    |
|      |          | Broadleaves | 25.7                   | 34.4     | 37.1    | 2.96                                | 3.97     | 4.28    |
| 2035 | CSI      | Total       | 22.7                   | 33.9     | 41.9    | 2.99                                | 4.45     | 5.54    |
|      |          | Conifers    | 7.8                    | 11.6     | 15.1    | 1.27                                | 1.88     | 2.46    |
|      |          | Broadleaves | 14.9                   | 22.2     | 26.8    | 1.72                                | 2.56     | 3.09    |
|      | MSR      | Total       | 35.1                   | 46.4     | 51.9    | 4.64                                | 6.13     | 6.89    |
|      |          | Conifers    | 12.6                   | 16.6     | 19.5    | 2.04                                | 2.69     | 3.16    |
|      |          | Broadleaves | 22.5                   | 29.8     | 32.4    | 2.59                                | 3.44     | 3.73    |
|      | LSR      | Total       | 41.1                   | 54.1     | 60.2    | 5.47                                | 7.21     | 8.08    |
|      |          | Conifers    | 15.8                   | 20.8     | 24.2    | 2.55                                | 3.37     | 3.92    |
|      |          | Broadleaves | 25.3                   | 33.3     | 36.1    | 2.92                                | 3.83     | 4.16    |
| 2050 | CSI      | Total       | 21.7                   | 29.0     | 37.2    | 2.86                                | 3.81     | 4.93    |
|      |          | Conifers    | 7.7                    | 10.0     | 13.9    | 1.25                                | 1.62     | 2.25    |
|      |          | Broadleaves | 14.0                   | 19.0     | 23.3    | 1.61                                | 2.19     | 2.68    |
|      | MSR      | Total       | 25.2                   | 32.6     | 38.1    | 3.36                                | 4.33     | 5.13    |
|      |          | Conifers    | 9.9                    | 12.3     | 15.7    | 1.60                                | 1.99     | 2.54    |
|      |          | Broadleaves | 15.3                   | 20.3     | 22.5    | 1.76                                | 2.34     | 2.59    |
|      | LSR      | Total       | 22.7                   | 27.3     | 32.3    | 3.05                                | 3.65     | 4.37    |
|      |          | Conifers    | 9.4                    | 10.8     | 14.0    | 1.52                                | 1.75     | 2.27    |
|      |          | Broadleaves | 13.3                   | 16.5     | 18.2    | 1.53                                | 1.90     | 2.10    |

\*primary energy

**S1 Table 4:** Neglecting costs, the additional potential in [%] of wood fuel from forests in Switzerland in 2020, 2035 and 2050 in Switzerland, in total and for broadleaves and conifers separately. Difference between the ecologically sustainable potential (ESP, no costs considered) and the SP (considering costs as a restriction) of the CSI for all of the different forest management strategies (CSI, MSR, LSR).

| Time | Scenario | Wood type   | Additional Potential in [%] compared to the corresponding CSI |          |         |
|------|----------|-------------|---------------------------------------------------------------|----------|---------|
|      |          |             | Minimum                                                       | Expected | Maximum |
| 2020 | CSI      | Total       | 64.8                                                          | 60.4     | 32.7    |
|      |          | Conifers    | 74.3                                                          | 72.2     | 39.5    |
|      |          | Broadleaves | 60.0                                                          | 54.6     | 29.0    |
|      | MSR      | Total       | 142.0                                                         | 112.6    | 97.9    |
|      |          | Conifers    | 176.4                                                         | 149.6    | 124.1   |
|      |          | Broadleaves | 124.4                                                         | 94.7     | 83.5    |
|      | LSR      | Total       | 198.8                                                         | 167.5    | 147.5   |
|      |          | Conifers    | 238.9                                                         | 212.0    | 177.6   |
|      |          | Broadleaves | 178.4                                                         | 146.0    | 131.0   |
|      | CSI      | Total       | 65.7                                                          | 60.5     | 32.1    |
|      |          | Conifers    | 71.2                                                          | 68.7     | 35.8    |
|      |          | Broadleaves | 63.0                                                          | 56.5     | 30.2    |
| 2035 | MSR      | Total       | 155.8                                                         | 120.1    | 63.4    |
|      |          | Conifers    | 176.0                                                         | 140.8    | 74.5    |
|      |          | Broadleaves | 145.8                                                         | 110.1    | 57.5    |
|      | LSR      | Total       | 199.4                                                         | 156.4    | 89.8    |
|      |          | Conifers    | 245.0                                                         | 202.1    | 116.7   |
|      |          | Broadleaves | 176.7                                                         | 134.3    | 75.3    |
|      | CSI      | Total       | 75.3                                                          | 57.1     | 35.6    |
|      |          | Conifers    | 82.9                                                          | 63.3     | 40.8    |
|      |          | Broadleaves | 71.3                                                          | 54.1     | 32.6    |
|      | MSR      | Total       | 103.2                                                         | 76.4     | 39.2    |
|      |          | Conifers    | 133.7                                                         | 100.8    | 58.8    |
|      |          | Broadleaves | 87.4                                                          | 64.3     | 28.1    |
| 2050 | LSR      | Total       | 83.0                                                          | 48.0     | 17.7    |
|      |          | Conifers    | 122.5                                                         | 77.0     | 42.0    |
|      |          | Broadleaves | 62.5                                                          | 33.6     | 3.9     |

**S1 Table 5:** Energy use [20] and derived material use of the harvested wood.

| Wood compartments    | In [%]   |     |           |     |             |     |           |     |
|----------------------|----------|-----|-----------|-----|-------------|-----|-----------|-----|
|                      | Conifers |     |           |     | Broadleaves |     |           |     |
|                      | energy   |     | materials |     | energy      |     | materials |     |
|                      | EO-      | EO+ | EO-       | EO+ | EO-         | EO+ | EO-       | EO+ |
| Bark and brushwood   | 100      |     | 0         |     | 100         |     | 0         |     |
| Forest residual wood | 100      | 100 | 0         | 0   | 100         | 100 | 0         | 0   |
| Branch merchantable  | 100      | 100 | 0         | 0   | 100         | 100 | 0         | 0   |
| Round wood 1 (thin)  | 50       | 70  | 50        | 30  | 100         | 100 | 0         | 0   |
| Round wood 2         | 10       | 25  | 90        | 75  | 45          | 85  | 55        | 15  |
| Round wood 3         | 15       | 30  | 85        | 70  | 40          | 80  | 60        | 20  |
| Round wood 4         | 20       | 40  | 80        | 60  | 40          | 80  | 60        | 20  |
| Round wood 5         | 20       | 40  | 80        | 60  | 50          | 80  | 50        | 20  |
| Round wood 6 (thick) | 20       | 50  | 80        | 50  | 50          | 80  | 50        | 20  |

\*EO- less energy-oriented wood market; EO+ energy-oriented wood market

**S2: Wood fuel from trees outside forests (landscapes)****S2 Table 6:** Theoretical and sustainable potential of wood from trees outside forests in Switzerland 2020, 2035 and 2050.

| Year |          | Theoretical potential               |                                     | Sustainable potential               |                                     |
|------|----------|-------------------------------------|-------------------------------------|-------------------------------------|-------------------------------------|
|      |          | [PJ a <sup>-1</sup> ] <sup>*1</sup> | M [m <sup>3</sup> a <sup>-1</sup> ] | [PJ a <sup>-1</sup> ] <sup>*1</sup> | M [m <sup>3</sup> a <sup>-1</sup> ] |
| 2020 | Minimum  | 7.5                                 | 0.80                                | 3.8                                 | 0.40                                |
|      | Expected | 9.4                                 | 1.00                                | 4.8                                 | 0.50                                |
|      | Maximum  | 11.3                                | 1.20                                | 5.8                                 | 0.60                                |
| 2035 | Minimum  | 7.0                                 | 0.74                                | 3.6                                 | 0.38                                |
|      | Expected | 11.7                                | 1.24                                | 6.0                                 | 0.63                                |
|      | Maximum  | 16.4                                | 1.74                                | 8.4                                 | 0.88                                |
| 2050 | Minimum  | 4.6                                 | 0.49                                | 2.4                                 | 0.25                                |
|      | Expected | 11.6                                | 1.23                                | 5.9                                 | 0.62                                |
|      | Maximum  | 18.5                                | 1.97                                | 9.5                                 | 0.99                                |

<sup>\*1</sup>primary energy

**S2 Table 7:** Wood from trees outside forests. Stocked categories from the areal statistics [66] and assigned increments considering different coverage levels (optimal growth conditions: 100% and with growth according to realistic coverage levels) (for more details cf. [51]).

| Stocked categories                            |        |                                                     | Optimal growth; 100% coverage level [t ha <sup>-1</sup> a <sup>-1</sup> ] dry matter | Source                                      | Growth according to realistic coverage level [t ha <sup>-1</sup> a <sup>-1</sup> ] dry matter | Source/ Assumption*                                       |
|-----------------------------------------------|--------|-----------------------------------------------------|--------------------------------------------------------------------------------------|---------------------------------------------|-----------------------------------------------------------------------------------------------|-----------------------------------------------------------|
| Group                                         | Nr. AS | Specific information on the area                    |                                                                                      |                                             |                                                                                               |                                                           |
| Building areas                                | 2      | Surroundings of industrial and commercial buildings | -                                                                                    | -                                           | 0.6                                                                                           | Kaltschmitt et al. 2009                                   |
|                                               | 4      | Surroundings of one- and two-family houses          | -                                                                                    | -                                           | 0.6                                                                                           |                                                           |
|                                               | 6      | Surroundings of terraced houses                     | -                                                                                    | -                                           | 0.6                                                                                           |                                                           |
|                                               | 8      | Surroundings of blocks of flats                     | -                                                                                    | -                                           | 0.6                                                                                           |                                                           |
|                                               | 10     | Surroundings of public buildings                    | -                                                                                    | -                                           | 0.6                                                                                           |                                                           |
|                                               | 12     | Surroundings of agricultural building               | -                                                                                    | -                                           | 0.6                                                                                           |                                                           |
|                                               | 14     | Surroundings of unspecified building                | -                                                                                    | -                                           | 0.6                                                                                           |                                                           |
|                                               | 17     | Roads and paths                                     | -                                                                                    | -                                           | 0.6                                                                                           |                                                           |
|                                               | 31     | Public parks                                        | -                                                                                    | -                                           | 1.75                                                                                          |                                                           |
|                                               | 32     | Sports facilities                                   | -                                                                                    | -                                           | 0.6                                                                                           |                                                           |
|                                               | 33     | Golf courses                                        | -                                                                                    | -                                           | 0.6                                                                                           |                                                           |
|                                               | 34     | Camping areas                                       | -                                                                                    | -                                           | 1.75                                                                                          |                                                           |
|                                               | 35     | Garden allotments                                   | -                                                                                    | -                                           | 0.6                                                                                           |                                                           |
|                                               | 36     | Cementeries                                         | -                                                                                    | -                                           | 2.25                                                                                          |                                                           |
| Transportation areas                          | 16     | Green motorway environs                             | 8.3                                                                                  | A.Müller (SBB), A. Bürgi (WSL) in FOEN 2009 | 4.15                                                                                          | FOEN 2009; coverage level 50% (FSO 2006)                  |
|                                               | 18     | Green road environs                                 | 8.3                                                                                  | A.Müller (SBB), A. Bürgi (WSL) in FOEN 2009 | 4.15                                                                                          |                                                           |
|                                               | 21     | Green railway environs                              | 8.3                                                                                  | A.Müller (SBB), A. Bürgi (WSL) in FOEN 2009 | 4.15                                                                                          |                                                           |
| Agricultural areas, tree and brush vegetation | 37     | Intensive orchards                                  | -                                                                                    | -                                           | 3.5                                                                                           | Kaltschmitt et al. 2009; coverage level: 100% (BFS, 2006) |
|                                               | 38     | Field fruit trees                                   | -                                                                                    | -                                           | 0.6                                                                                           | Based on the assumptions of Kaltschmitt et al.            |

| Stocked categories                            |        |                                           | Optimal growth; 100% coverage level [t ha <sup>-1</sup> a <sup>-1</sup> ] dry matter | Source                                                                             | Growth according to realistic coverage level [t ha <sup>-1</sup> a <sup>-1</sup> ] dry matter | Source/ Assumption*                                                                                                                             |
|-----------------------------------------------|--------|-------------------------------------------|--------------------------------------------------------------------------------------|------------------------------------------------------------------------------------|-----------------------------------------------------------------------------------------------|-------------------------------------------------------------------------------------------------------------------------------------------------|
| Group                                         | Nr. AS | Specific information on the area          |                                                                                      |                                                                                    |                                                                                               |                                                                                                                                                 |
| Agricultural areas, tree and brush vegetation | 39     | Vineyards                                 | -                                                                                    | -                                                                                  | 1.5                                                                                           | 2009 orchards were assumed to have coverage levels of 25% for spread-out and 100% for well-ordered orchards (FSO, 2006).                        |
|                                               | 44     | Brush meadows and farm pastures           | 8.3                                                                                  | Abegg et al. 2020, conversion factor: 0.6 m <sup>3</sup> t <sup>-1</sup> FOEN 2009 | 4.15                                                                                          | Kaltschmitt et al., 2009<br>Abegg et al. 2020, conversion factor: 0.6 m <sup>3</sup> t <sup>-1</sup> FOEN 2009, coverage level: 50% (FSO, 2006) |
|                                               | 47     | Brush alpine pastures                     | 6                                                                                    | FOEN 2009                                                                          | 3                                                                                             | Coverage level: 50% (FSO 2006)                                                                                                                  |
|                                               | 59     | Clusters of trees (on agricultural areas) | 8.3                                                                                  | Abegg et al. 2020, conversion factor: 0.6 m <sup>3</sup> t <sup>-1</sup> FOEN 2009 | 0.8                                                                                           | Coverage level: 10% (FSO 2006).                                                                                                                 |
|                                               | 60     | Clusters of trees (on unproductive areas) | 8.3                                                                                  | Abegg et al. 2020, conversion factor: 0.6 m <sup>3</sup> t <sup>-1</sup> FOEN 2009 | 0.8                                                                                           | Coverage level: 10% (FSO 2006).                                                                                                                 |
|                                               | 64     | Scrub vegetation                          | 5                                                                                    |                                                                                    | 3                                                                                             | Own assumption according to hedges due to lack of data.                                                                                         |
|                                               | 58     | Groves, hedges                            | 5                                                                                    | FOEN 2009                                                                          | 3                                                                                             | Coverage level: 60% FSO 2006                                                                                                                    |
|                                               | 62     | Rivers                                    | 9                                                                                    | FOEN 2009 for embankments                                                          | 3                                                                                             | FOEN 2009 used 9t of dry matter                                                                                                                 |
|                                               | 63     | Flood protection structures               | 9                                                                                    | FOEN 2009 for embankments                                                          | 3                                                                                             | for embankments. Along rivers and flood protection structures we expect rather small stockings as they are only partly vegetated.               |
|                                               |        |                                           |                                                                                      |                                                                                    |                                                                                               |                                                                                                                                                 |

\*for details on coverage levels see [51]



**S2 Table 8:** Growth per altitude and canton (upper part; based on [63]) and the corresponding net growth factors (lower part).

| Canton/Altitude | >1800 | 1401-1800 | 1001-1400 | 601-1000 | <600 |
|-----------------|-------|-----------|-----------|----------|------|
| AG              |       |           |           | 10.1     | 10.5 |
| AI              |       |           | 7.3       | 16.1     |      |
| AR              |       |           | 12.8      | 17.3     |      |
| BE              | 4.4   | 6.3       | 8.4       | 11.8     | 12.9 |
| BLBS            |       |           |           | 7.3      | 8.2  |
| FR              |       | 15.6      | 14.8      | 12       | 12.1 |
| GE              |       |           |           |          | 7.9  |
| GL              |       | 7         | 7.7       | 9.8      |      |
| GR              | 3.9   | 6.6       | 7.5       | 6.1      | 3.3  |
| JU              |       |           | 10.6      | 8.1      | 11.3 |
| LU              |       | 7.9       | 10.4      | 16.0     | 15.5 |
| NE              |       |           | 9.8       | 10.0     | 9.2  |
| NW              |       | 9         | 8.0       | 13.6     |      |
| OW              |       | 6.3       | 6.8       | 5.3      | 15.8 |
| SG              |       | 4.3       | 10.7      | 12.6     | 10.2 |
| SH              |       |           |           | 11.3     | 13.2 |
| SO              |       |           | 7.2       | 7.5      | 10   |
| SZ              |       | 4.9       | 9.8       | 10.2     | 13.6 |
| TG              |       |           |           | 14.6     | 14.6 |
| TI              | 3.6   | 5.3       | 5.0       | 4.8      | 5.8  |
| UR              |       | 7.4       | 7.7       | 7.8      | 14.3 |
| VD              |       | 6.7       | 8.5       | 10.2     | 10.8 |
| VS              | 4.0   | 6.5       | 6.3       | 5.3      | 3.8  |
| ZG              |       | 0.0       | 10.9      | 11.8     | 16.3 |
| ZH              |       |           | 16.1      | 11.2     | 10.9 |
| AG              |       |           |           | 0.96     | 1.00 |
| AI              |       |           | 0.45      | 1.00     |      |
| AR              |       |           | 0.74      | 1.00     |      |
| BE              | 0.34  | 0.49      | 0.65      | 0.91     | 1.00 |
| BLBS            |       |           |           | 0.89     | 1.00 |
| FR              |       | 1.00      | 0.95      | 0.77     | 0.78 |
| GE              |       |           |           |          | 1.00 |
| GL              |       | 0.71      | 0.79      | 1.00     |      |
| GR              | 0.52  | 0.88      | 1.00      | 0.81     | 0.44 |
| JU              |       |           | 0.94      | 0.72     | 1.00 |
| LU              |       | 0.49      | 0.65      | 1.00     | 0.97 |
| NE              |       |           | 0.98      | 1.00     | 0.92 |
| NW              |       | 0.66      | 0.59      | 1.00     |      |
| OW              |       | 0.4       | 0.43      | 0.34     | 1.00 |
| SG              |       | 0.34      | 0.85      | 1.00     | 0.81 |
| SH              |       |           |           | 0.86     | 1.00 |
| SO              |       |           | 0.72      | 0.75     | 1.00 |
| SZ              |       | 0.36      | 0.72      | 0.75     | 1.00 |
| TG              |       |           |           | 1.00     | 1.00 |
| TI              | 0.62  | 0.91      | 0.86      | 0.83     | 1.00 |
| UR              |       | 0.52      | 0.54      | 0.55     | 1.00 |

| Canton/Altitude | >1800 | 1401-1800 | 1001-1400 | 601-1000 | <600 |
|-----------------|-------|-----------|-----------|----------|------|
| VD              |       | 0.62      | 0.79      | 0.94     | 1.00 |
| VS              | 0.62  | 1.00      | 0.97      | 0.82     | 0.58 |
| ZG              |       | 0         | 0.67      | 0.72     | 1.00 |
| ZH              |       |           | 1         | 0.70     | 0.68 |

### S3: Wood fuel from residues

**S3 Table 9:** Theoretical and sustainable potential of wood residues for energy 2020, 2035 and 2050 in Switzerland.

| Year |          | Theoretical potential               |                                     | Sustainable potential               |                                     |
|------|----------|-------------------------------------|-------------------------------------|-------------------------------------|-------------------------------------|
|      |          | [PJ a <sup>-1</sup> ]* <sup>1</sup> | M [m <sup>3</sup> a <sup>-1</sup> ] | [PJ a <sup>-1</sup> ]* <sup>1</sup> | M [m <sup>3</sup> a <sup>-1</sup> ] |
| 2020 | Minimum  | 60.2                                | 8.5                                 | 5.8                                 | 0.8                                 |
|      | Expected | 62.1                                | 8.8                                 | 7.4                                 | 1.0                                 |
|      | Maximum  | 64.0                                | 9.1                                 | 9.1                                 | 1.3                                 |
| 2035 | Minimum  | 64.3                                | 8.8                                 | 4.2                                 | 0.6                                 |
|      | Expected | 66.6                                | 9.4                                 | 6.1                                 | 0.9                                 |
|      | Maximum  | 68.8                                | 9.7                                 | 7.7                                 | 1.1                                 |
| 2050 | Minimum  | 53.9                                | 7.6                                 | 2.4                                 | 0.3                                 |
|      | Expected | 56.9                                | 8.1                                 | 4.2                                 | 0.6                                 |
|      | Maximum  | 59.9                                | 8.5                                 | 5.9                                 | 0.8                                 |

\*<sup>1</sup>primary energy

**S3 Table 10:** Sustainable forest wood harvesting potential in Switzerland (moderate stock reduction, MSR). The reserve areas, harvest losses and costs are deducted. The wood used for materials has not yet been deducted because wood residues are produced during the processing of wood.

| Year |          | M [m <sup>3</sup> a <sup>-1</sup> ] |          |       |
|------|----------|-------------------------------------|----------|-------|
|      |          | Broadleaves                         | Conifers | Total |
| 2020 | Minimum  | 1.97                                | 2.78     | 4.75  |
|      | Expected | 2.47                                | 3.42     | 5.89  |
|      | Maximum  | 2.98                                | 4.17     | 7.15  |
| 2035 | Minimum  | 1.75                                | 2.25     | 4.00  |
|      | Expected | 2.46                                | 3.11     | 5.57  |
|      | Maximum  | 3.02                                | 3.84     | 6.86  |
| 2050 | Minimum  | 1.00                                | 1.53     | 2.53  |
|      | Expected | 1.62                                | 2.38     | 3.99  |
|      | Maximum  | 2.18                                | 3.19     | 5.38  |

**S4: Wood fuel from waste wood****S4 Table 11:** Theoretical and sustainable potential of waste wood for energy use in Switzerland in the years 2020, 2035 and 2050.

| Year |          | Theoretical potential               |                        | Sustainable potential               |                        |
|------|----------|-------------------------------------|------------------------|-------------------------------------|------------------------|
|      |          | [PJ a <sup>-1</sup> ] <sup>*1</sup> | M [t a <sup>-1</sup> ] | [PJ a <sup>-1</sup> ] <sup>*1</sup> | M [t a <sup>-1</sup> ] |
| 2020 | Minimum  | 12.9                                | 0.90                   | 10.6                                | 0.74                   |
|      | Expected | 14.3                                | 1.00                   | 11.7                                | 0.82                   |
|      | Maximum  | 15.8                                | 1.10                   | 12.9                                | 0.90                   |
| 2035 | Minimum  | 14.8                                | 1.03                   | 12.1                                | 0.85                   |
|      | Expected | 16.5                                | 1.15                   | 13.5                                | 0.94                   |
|      | Maximum  | 20.3                                | 1.41                   | 17.0                                | 1.18                   |
| 2050 | Minimum  | 15.3                                | 1.07                   | 12.6                                | 0.88                   |
|      | Expected | 17.1                                | 1.19                   | 14.0                                | 0.97                   |
|      | Maximum  | 20.9                                | 1.46                   | 17.5                                | 1.22                   |

<sup>\*1</sup>primary energy**S5: All woody biomass****S5 Table 12:** Theoretical potential<sup>\*1</sup> of all woody biomass for energy use in Switzerland in the years, 2020, 2035 and 2050.

| Year | Strategy | [PJ a <sup>-1</sup> ] <sup>*2</sup> |          |         |
|------|----------|-------------------------------------|----------|---------|
|      |          | Minimum                             | Expected | Maximum |
| 2020 | CSI      | 167.2                               | 174.7    | 184.6   |
|      | MSR      | 179.7                               | 187.9    | 198.8   |
|      | LSR      | 194.7                               | 203.9    | 216.1   |
| 2035 | CSI      | 177.2                               | 195.2    | 217.8   |
|      | MSR      | 192.7                               | 205.1    | 222.4   |
|      | LSR      | 206.7                               | 219.6    | 237.6   |
| 2050 | CSI      | 164.8                               | 188.6    | 217.2   |
|      | MSR      | 162.3                               | 179.1    | 200.0   |
|      | LSR      | 149.1                               | 163.2    | 181.0   |

<sup>\*1</sup> Wood residues and waste wood have their origins in forest wood and wood from landscape maintenance. In order to calculate the total theoretical potential of the woody biomass, the theoretical potential of wood residues and waste wood are therefore not added to the theoretical potential of wood fuel.

<sup>\*2</sup>primary energy**S5 Table 13:** Sustainable potential of all woody biomass for energy use in Switzerland, 2020, 2035 and 2050.

| Year | Strategy | [PJ a <sup>-1</sup> ] |          |         |
|------|----------|-----------------------|----------|---------|
|      |          | Minimum               | Expected | Maximum |
| 2020 | CSI      | 34.1                  | 44.7     | 59.5    |
|      | MSR      | 40.1                  | 54.2     | 64.5    |
|      | LSR      | 45.9                  | 63.4     | 75.1    |
| 2035 | CSI      | 33.6                  | 46.7     | 64.8    |
|      | MSR      | 42.7                  | 57.3     | 71.8    |
|      | LSR      | 43.5                  | 61.8     | 77.8    |
| 2050 | CSI      | 29.8                  | 42.6     | 60.3    |
|      | MSR      | 30.4                  | 44.2     | 59.4    |
|      | LSR      | 26.5                  | 38.6     | 52.9    |

## S6: All biomass types

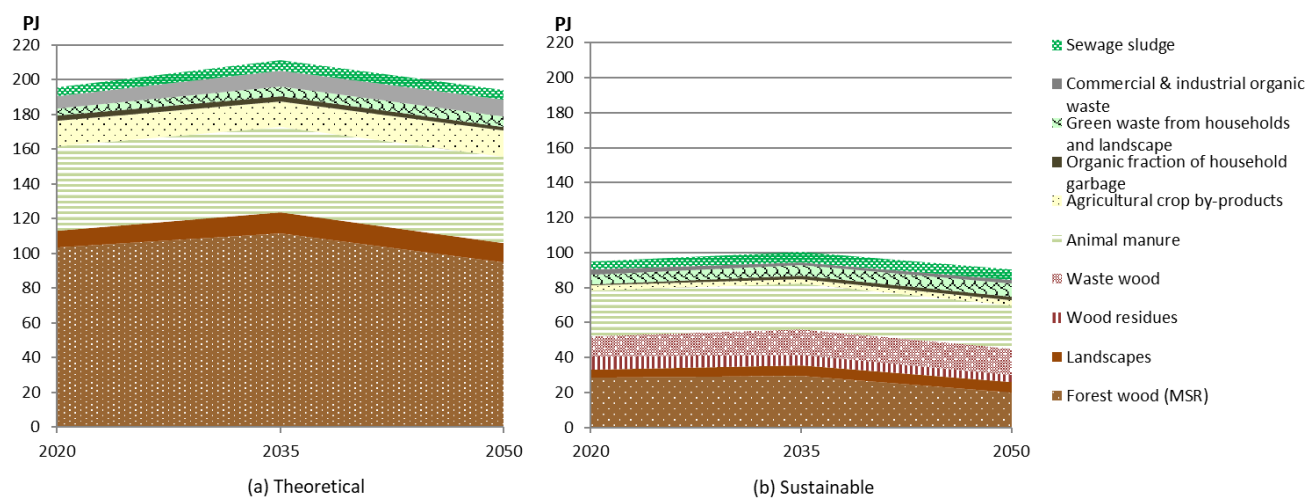

S6 Figure1: Theoretical and sustainable potential fuel potentials of all biomass types for 2020, 2035 and 2050. For woody biomass the scenario “expected” was applied and for wood fuel from forests the management strategy moderate stock reduction (MSR) with a less energy oriented wood market (EO-) was applied. The values for the non-woody biomass types were estimated [30] for the first time-step (values for 2014 were used for 2020) and for [39] for the future (2035, 2050).

\*Wood residues and waste wood have their origins in the forest wood and wood from landscape maintenance. In order to calculate the total theoretical potential of the woody biomass, the theoretical potential of wood residues and waste wood are therefore not added to the theoretical potential of wood fuel.

**S6 Table 14:** Comparison of wood that has already been used and the woody and non-woody (wet-biomass) energy potentials in Switzerland [PJ; primary energy] today (2020) and in the future (2035, 2050) [PJ; primary energy].

| Category              |                                           | Already used       | Theoretical (2020) |        |        | Sustainable (2020) |       | Theoretical (2035) |        | Sustainable (2035) |       | Theoretical (2050) |        | Sustainable (2050) |       |
|-----------------------|-------------------------------------------|--------------------|--------------------|--------|--------|--------------------|-------|--------------------|--------|--------------------|-------|--------------------|--------|--------------------|-------|
|                       |                                           |                    | Min.               | Max.   |        | Min.               | Max.  | Min.               | Max.   | Min.               | Max.  | Min.               | Max.   | Min.               | Max.  |
| Woody                 | Forests                                   | 16.7 <sup>*3</sup> | CSI <sup>*6</sup>  | 86.6   | 99.5   | 13.9               | 24.9  | 91.1               | 112.3  | 13.7               | 31.7  | 91.0               | 117.9  | 12.4               | 27.4  |
|                       |                                           |                    | MSR <sup>*6</sup>  | 99.1   | 107.7  | 19.9               | 36.7  | 106.6              | 116.9  | 20.4               | 38.7  | 88.5               | 100.7  | 13.0               | 26.5  |
|                       |                                           |                    | LSR <sup>*6</sup>  | 114.1  | 125.0  | 25.7               | 47.3  | 120.6              | 132.1  | 23.6               | 44.7  | 75.5               | 81.7   | 9.1                | 20.0  |
|                       | Landscapes                                | 2.3 <sup>*2</sup>  |                    | 7.5    | 11.3   | 3.8                | 5.8   | 7.0                | 16.4   | 3.6                | 8.4   | 4.6                | 18.5   | 2.4                | 9.5   |
|                       | Wood residues <sup>*4</sup>               | 7.8 <sup>*2</sup>  |                    | [60.2] | [64.0] | 5.8                | 9.1   | [64.3]             | [68.8] | 4.2                | 7.7   | [53.9]             | [59.9] | 2.4                | 5.9   |
|                       | Waste wood <sup>*4</sup>                  | 9.2 <sup>*2</sup>  |                    | [12.9] | [15.8] | 10.6               | 12.9  | [14.8]             | [20.3] | 12.1               | 17    | [15.3]             | [20.9] | 12.6               | 17.5  |
| All woody biomass     |                                           | 36.0               | CSI <sup>*6</sup>  | 94.1   | 110.8  | 34.1               | 52.7  | 98.1               | 128.7  | 33.6               | 64.8  | 95.6               | 136.4  | 29.8               | 60.3  |
|                       |                                           |                    | MSR <sup>*6</sup>  | 106.6  | 119.0  | 40.1               | 64.5  | 113.6              | 133.3  | 40.3               | 71.8  | 93.1               | 119.2  | 30.4               | 59.4  |
|                       |                                           |                    | LSR <sup>*6</sup>  | 121.6  | 136.3  | 45.9               | 75.1  | 127.6              | 148.5  | 43.5               | 77.8  | 80.1               | 100.2  | 26.5               | 52.9  |
| Non-woody             | Animal manure                             | 2.6 <sup>*2</sup>  | 48.8 <sup>*2</sup> |        |        | 26.9 <sup>*2</sup> |       | 49.2 <sup>*1</sup> |        | 26.2 <sup>*1</sup> |       | 49.4 <sup>*1</sup> |        | 25.0 <sup>*1</sup> |       |
|                       | Agricultural crop by products             | 0.0 <sup>*2</sup>  | 14.9 <sup>*2</sup> |        |        | 2.6 <sup>*2</sup>  |       | 15.0 <sup>*1</sup> |        | 2.7 <sup>*1</sup>  |       | 15.0 <sup>*1</sup> |        | 2.7 <sup>*1</sup>  |       |
|                       | Organic fraction of household garbage     | 6.0 <sup>*2</sup>  | 6.0 <sup>*2</sup>  |        |        | 3.9 <sup>*2</sup>  |       | 2.7 <sup>*1</sup>  |        | 1.6 <sup>*1</sup>  |       | 2.1 <sup>*1</sup>  |        | 2.1 <sup>*1</sup>  |       |
|                       | Green waste from households and landscape | 2.2 <sup>*2</sup>  | 4.3 <sup>*2</sup>  |        |        | 5.8 <sup>*2</sup>  |       | 5.6 <sup>*1</sup>  |        | 6.1 <sup>*1</sup>  |       | 6.3 <sup>*1</sup>  |        | 7.8 <sup>*1</sup>  |       |
|                       | Commercial and industrial organic waste   | 2.0 <sup>*2</sup>  | 13.6 <sup>*2</sup> |        |        | 2.7 <sup>*2</sup>  |       | 9.3 <sup>*1</sup>  |        | 1.8 <sup>*1</sup>  |       | 9.3 <sup>*1</sup>  |        | 1.8 <sup>*1</sup>  |       |
|                       | Sewage sludge                             | 3.4 <sup>*2</sup>  | 4.9 <sup>*2</sup>  |        |        | 4.9 <sup>*2</sup>  |       | 5.8 <sup>*1</sup>  |        | 5.8 <sup>*1</sup>  |       | 6.0 <sup>*1</sup>  |        | 6.0 <sup>*1</sup>  |       |
| All non-woody biomass |                                           | 16.2               | 92.5               |        |        | 46.8               |       | 87.6               |        | 44.2               |       | 88.1               |        | 45.4               |       |
| All biomass           |                                           | 52.2               | CSI <sup>*6</sup>  | 186.6  | 203.3  | 80.9               | 99.5  | 185.7              | 216.3  | 77.8               | 109.0 | 183.7              | 224.5  | 75.2               | 105.7 |
|                       |                                           |                    | MSR <sup>*6</sup>  | 199.1  | 211.5  | 86.9               | 111.3 | 201.2              | 220.9  | 84.5               | 116.0 | 181.2              | 207.3  | 75.8               | 104.8 |
|                       |                                           |                    | LSR <sup>*6</sup>  | 214.1  | 228.8  | 92.7               | 121.9 | 215.2              | 236.1  | 87.7               | 122.0 | 168.2              | 188.3  | 71.9               | 98.3  |

<sup>\*1</sup> Non-woody biomass from [39]

<sup>\*2</sup> [30]

<sup>\*3</sup> [20]

<sup>\*4</sup> Wood residues and waste wood have their origins in the forest wood and wood from landscape maintenance. In order to calculate the total theoretical potential of the woody biomass, the theoretical potential of wood residues and waste wood are therefore not added to the theoretical potential of wood fuel.

<sup>\*5</sup> Using the already used amount a starting point and the SPs as the upper limit.

<sup>\*6</sup> Applied management scenario in forests (CSI: Continuous stock increase; MSR: moderate stock reduction; LSR: Large stock reduction).
